# Supplementary material for: Facile synthesis of mesoporous Mn3O4nanorods as a promising anode material for high performance lithium-ion batteries
Source: Royal Society of Chemistry journal article supplement (doi:10.1039/c4ta03532a), 2014-08-13
Supplement: c4ta03532a1.pdf [file c4ta03532a1.pdf]

## Facile Synthesis of Mesoporous $\text{Mn}_3\text{O}_4$ Nanorods as a Promising Anode Material for High Performance Lithium-Ion Batteries

Zhongchao Bai,<sup>a\*</sup> Xiangyu Zhang,<sup>a</sup> Yuwen Zhang,<sup>a</sup> Chunli Guo,<sup>a</sup> Bin Tang,<sup>a</sup>

<sup>a</sup> Research Institute of Surface Engineering, Taiyuan University of Technology,

Taiyuan, 030024, China. Tel.: +86 351 6010540. E-mail: [baizhongchao@tyut.edu.cn](mailto:baizhongchao@tyut.edu.cn)

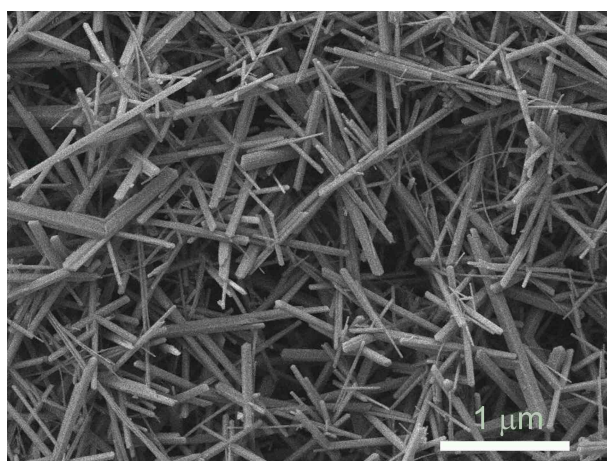

**Figure S11.** SEM image of the synthesized nonporous  $\text{Mn}_3\text{O}_4$  nanorods.

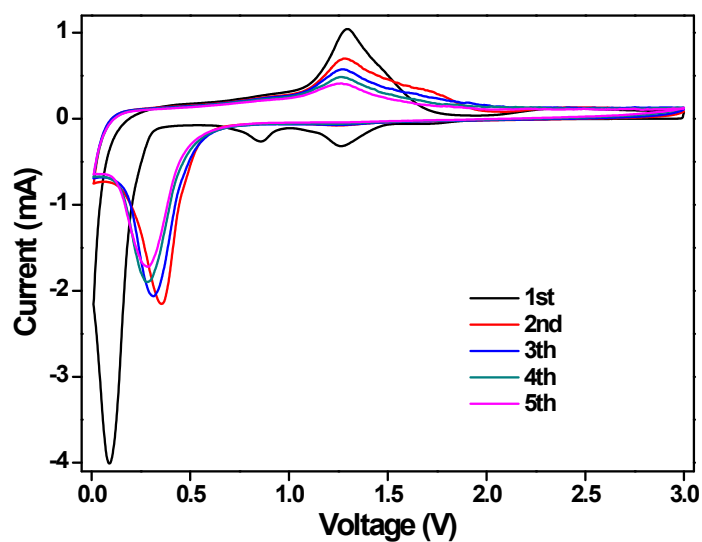

**Figure S12.** Cyclic voltammograms of the nonporous  $\text{Mn}_3\text{O}_4$  nanorods at a rate of 0.1  $\text{mV s}^{-1}$  in the voltage of 0.01-3.0 V vs.  $\text{Li/Li}^+$ .

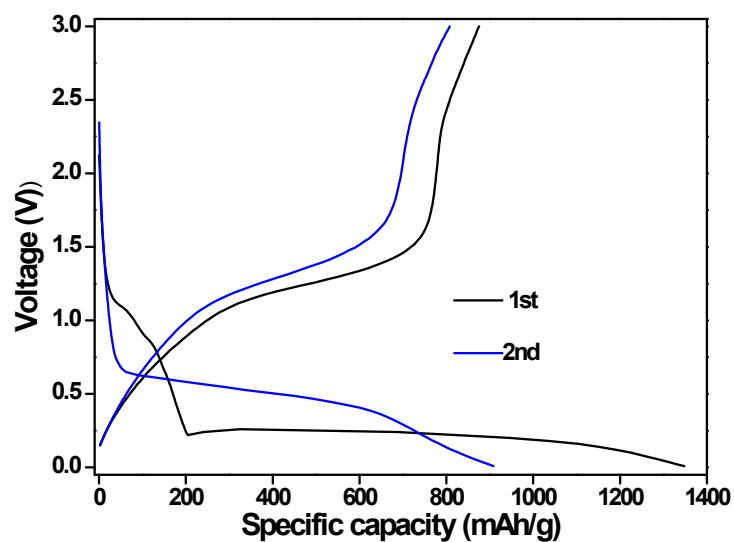

**Figure SI3.** The 1st and 2nd charge-discharge profiles of nonporous  $\text{Mn}_3\text{O}_4$  nanorods at a current density of  $500 \text{ mA g}^{-1}$  in the range of 0.01-3.0 V.

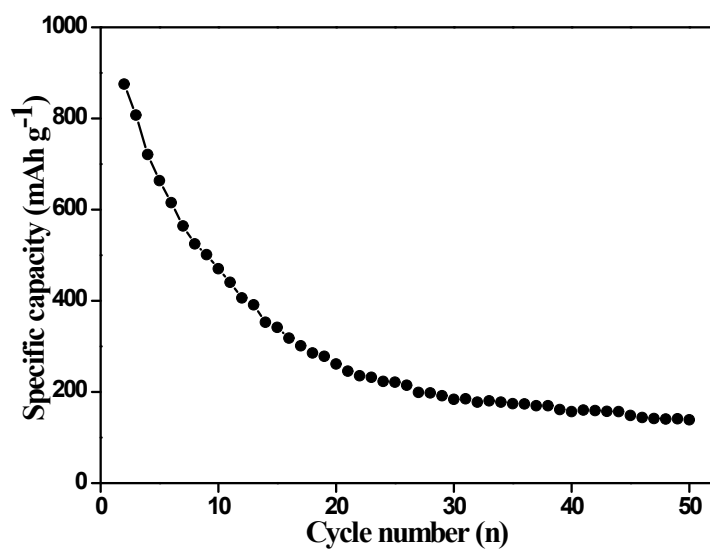

**Figure SI4.** Cycling performance of nonporous  $\text{Mn}_3\text{O}_4$  nanorods at a current density of  $500 \text{ mA g}^{-1}$ .
